# Supplementary material
Source: publisher site journal article supplement (http://studysites.sagepub.com/salkind4e/study/chapter/appendicies/Salkind%20Appendix%20B.pdf)
Supplement: Supplementary file 1 [file Salkind%20Appendix%20B.pdf]

# APPENDIX B

## Tables

### **TABLE B.1: AREAS BENEATH THE NORMAL CURVE**

---

How to use this table:

1. Compute the  $z$  score based on the raw score and the mean of the sample.
2. Read to the right of the  $z$  score to determine the percentage of area underneath the normal curve or the area between the mean and computed  $z$  score.





---

**TABLE B.2: T VALUES NEEDED FOR REJECTION OF THE NULL HYPOTHESIS**

---

How to use this table:

1. Compute the  $t$  value test statistic.
2. Compare the obtained  $t$  value to the critical value listed in this table. Be sure you have calculated the number of degrees of freedom correctly and you have selected an appropriate level of significance.
3. If the obtained value is greater than the critical or tabled value, the null hypothesis (that the means are equal) is not the most attractive explanation for any observed differences.
4. If the obtained value is less than the critical or table value, the null hypothesis is the most attractive explanation for any observed differences.

**Table B.2** *t* Values Needed for Rejection of the Null Hypothesis

| <i>df</i> | One-Tailed Test |       |        | <i>df</i> | Two-Tailed Test |        |        |
|-----------|-----------------|-------|--------|-----------|-----------------|--------|--------|
|           | 0.10            | 0.05  | 0.01   |           | 0.10            | 0.05   | 0.01   |
| 1         | 3.078           | 6.314 | 31.821 | 1         | 6.314           | 12.706 | 63.657 |
| 2         | 1.886           | 2.92  | 6.965  | 2         | 2.92            | 4.303  | 9.925  |
| 3         | 1.638           | 2.353 | 4.541  | 3         | 2.353           | 3.182  | 5.841  |
| 4         | 1.533           | 2.132 | 3.747  | 4         | 2.132           | 2.776  | 4.604  |
| 5         | 1.476           | 2.015 | 3.365  | 5         | 2.015           | 2.571  | 4.032  |
| 6         | 1.44            | 1.943 | 3.143  | 6         | 1.943           | 2.447  | 3.708  |
| 7         | 1.415           | 1.895 | 2.998  | 7         | 1.895           | 2.365  | 3.5    |
| 8         | 1.397           | 1.86  | 2.897  | 8         | 1.86            | 2.306  | 3.356  |
| 9         | 1.383           | 1.833 | 2.822  | 9         | 1.833           | 2.262  | 3.25   |
| 10        | 1.372           | 1.813 | 2.764  | 10        | 1.813           | 2.228  | 3.17   |
| 11        | 1.364           | 1.796 | 2.718  | 11        | 1.796           | 2.201  | 3.106  |
| 12        | 1.356           | 1.783 | 2.681  | 12        | 1.783           | 2.179  | 3.055  |
| 13        | 1.35            | 1.771 | 2.651  | 13        | 1.771           | 2.161  | 3.013  |
| 14        | 1.345           | 1.762 | 2.625  | 14        | 1.762           | 2.145  | 2.977  |
| 15        | 1.341           | 1.753 | 2.603  | 15        | 1.753           | 2.132  | 2.947  |
| 16        | 1.337           | 1.746 | 2.584  | 16        | 1.746           | 2.12   | 2.921  |
| 17        | 1.334           | 1.74  | 2.567  | 17        | 1.74            | 2.11   | 2.898  |
| 18        | 1.331           | 1.734 | 2.553  | 18        | 1.734           | 2.101  | 2.879  |
| 19        | 1.328           | 1.729 | 2.54   | 19        | 1.729           | 2.093  | 2.861  |
| 20        | 1.326           | 1.725 | 2.528  | 20        | 1.725           | 2.086  | 2.846  |
| 21        | 1.323           | 1.721 | 2.518  | 21        | 1.721           | 2.08   | 2.832  |
| 22        | 1.321           | 1.717 | 2.509  | 22        | 1.717           | 2.074  | 2.819  |

| df       | One-Tailed Test |       |       | df       | Two-Tailed Test |       |      |
|----------|-----------------|-------|-------|----------|-----------------|-------|------|
|          | 0.10            | 0.05  | 0.01  |          | 0.10            | 0.05  | 0.01 |
| 23       | 1.32            | 1.714 | 2.5   | 23       | 1.714           | 2.808 |      |
| 24       | 1.318           | 1.711 | 2.492 | 24       | 1.711           | 2.797 |      |
| 25       | 1.317           | 1.708 | 2.485 | 25       | 1.708           | 2.788 |      |
| 26       | 1.315           | 1.706 | 2.479 | 26       | 1.706           | 2.779 |      |
| 27       | 1.314           | 1.704 | 2.473 | 27       | 1.704           | 2.771 |      |
| 28       | 1.313           | 1.701 | 2.467 | 28       | 1.701           | 2.764 |      |
| 29       | 1.312           | 1.699 | 2.462 | 29       | 1.699           | 2.757 |      |
| 30       | 1.311           | 1.698 | 2.458 | 30       | 1.698           | 2.75  |      |
| 35       | 1.306           | 1.69  | 2.438 | 35       | 1.69            | 2.724 |      |
| 40       | 1.303           | 1.684 | 2.424 | 40       | 1.684           | 2.705 |      |
| 45       | 1.301           | 1.68  | 2.412 | 45       | 1.68            | 2.69  |      |
| 50       | 1.299           | 1.676 | 2.404 | 50       | 1.676           | 2.678 |      |
| 55       | 1.297           | 1.673 | 2.396 | 55       | 1.673           | 2.668 |      |
| 60       | 1.296           | 1.671 | 2.39  | 60       | 1.671           | 2.661 |      |
| 65       | 1.295           | 1.669 | 2.385 | 65       | 1.669           | 2.654 |      |
| 70       | 1.294           | 1.667 | 2.381 | 70       | 1.667           | 2.648 |      |
| 75       | 1.293           | 1.666 | 2.377 | 75       | 1.666           | 2.643 |      |
| 80       | 1.292           | 1.664 | 2.374 | 80       | 1.664           | 2.639 |      |
| 85       | 1.292           | 1.663 | 2.371 | 85       | 1.663           | 2.635 |      |
| 90       | 1.291           | 1.662 | 2.369 | 90       | 1.662           | 2.632 |      |
| 95       | 1.291           | 1.661 | 2.366 | 95       | 1.661           | 2.629 |      |
| 100      | 1.29            | 1.66  | 2.364 | 100      | 1.66            | 2.626 |      |
| Infinity | 1.282           | 1.645 | 2.327 | Infinity | 1.645           | 2.576 |      |

**TABLE B.3: CRITICAL VALUES FOR ANALYSIS OF VARIANCE OR F TEST**

---

How to use this table:

1. Compute the  $F$  value.
2. Determine the number of degrees of freedom for the numerator ( $k - 1$ ) and the number of degrees of freedom for the denominator ( $n - k$ ).
3. Locate the critical value by reading across to locate the degrees of freedom in the numerator and down to locate the degrees of freedom in the denominator. The critical value is at the intersection of this column and row.
4. If the obtained value is greater than the critical or tabled value, the null hypothesis (that the means are equal to one another) is not the most attractive explanation for any observed differences.
5. If the obtained value is less than the critical or tabled value, the null hypothesis is the most attractive explanation for any observed differences.

**Table B.3** Critical Values for Analysis of Variance or *F* Test

|                               |                   | <i>df</i> for the Numerator |         |         |         |         |         |
|-------------------------------|-------------------|-----------------------------|---------|---------|---------|---------|---------|
| <i>df</i> for the Denominator | Type I Error Rate | 1                           | 2       | 3       | 4       | 5       | 6       |
| 1                             | .01               | 4052.00                     | 4999.00 | 5403.00 | 5625.00 | 5764.00 | 5859.00 |
|                               | .05               | 162.00                      | 200.00  | 216.00  | 225.00  | 230.00  | 234.00  |
|                               | .10               | 39.90                       | 49.50   | 53.60   | 55.80   | 57.20   | 58.20   |
| 2                             | .01               | 98.50                       | 99.00   | 99.17   | 99.25   | 99.30   | 99.33   |
|                               | .05               | 18.51                       | 19.00   | 19.17   | 19.25   | 19.30   | 19.33   |
|                               | .10               | 8.53                        | 9.00    | 9.16    | 9.24    | 9.29    | 9.33    |
| 3                             | .01               | 34.12                       | 30.82   | 29.46   | 28.71   | 28.24   | 27.91   |
|                               | .05               | 10.13                       | 9.55    | 9.28    | 9.12    | 9.01    | 8.94    |
|                               | .10               | 5.54                        | 5.46    | 5.39    | 5.34    | 5.31    | 5.28    |
| 4                             | .01               | 21.20                       | 18.00   | 16.70   | 15.98   | 15.52   | 15.21   |
|                               | .05               | 7.71                        | 6.95    | 6.59    | 6.39    | 6.26    | 6.16    |
|                               | .10               | .55                         | 4.33    | 4.19    | 4.11    | 4.05    | 4.01    |
| 5                             | .01               | 16.26                       | 13.27   | 12.06   | 11.39   | 10.97   | 10.67   |
|                               | .05               | 6.61                        | 5.79    | 5.41    | 5.19    | 5.05    | 4.95    |
|                               | .10               | 4.06                        | 3.78    | 3.62    | 3.52    | 3.45    | 3.41    |
| 6                             | .01               | 13.75                       | 10.93   | 9.78    | 9.15    | 8.75    | 8.47    |
|                               | .05               | 5.99                        | 5.14    | 4.76    | 4.53    | 4.39    | 4.28    |
|                               | .10               | 3.78                        | 3.46    | 3.29    | 3.18    | 3.11    | 3.06    |
| 7                             | .01               | 12.25                       | 9.55    | 8.45    | 7.85    | 7.46    | 7.19    |
|                               | .05               | 5.59                        | 4.74    | 4.35    | 4.12    | 3.97    | 3.87    |
|                               | .10               | 3.59                        | 3.26    | 3.08    | 2.96    | 2.88    | 2.83    |
| 8                             | .01               | 11.26                       | 8.65    | 7.59    | 7.01    | 6.63    | 6.37    |
|                               | .05               | 5.32                        | 4.46    | 4.07    | 3.84    | 3.69    | 3.58    |
|                               | .10               | 3.46                        | 3.11    | 2.92    | 2.81    | 2.73    | 2.67    |
| 9                             | .01               | 10.56                       | 8.02    | 6.99    | 6.42    | 6.06    | 5.80    |
|                               | .05               | 5.12                        | 4.26    | 3.86    | 3.63    | 3.48    | 3.37    |
|                               | .10               | 3.36                        | 3.01    | 2.81    | 2.69    | 2.61    | 2.55    |
| 10                            | .01               | 10.05                       | 7.56    | 6.55    | 6.00    | 5.64    | 5.39    |
|                               | .05               | 4.97                        | 4.10    | 3.71    | 3.48    | 3.33    | 3.22    |
|                               | .10               | 3.29                        | 2.93    | 2.73    | 2.61    | 2.52    | 2.46    |

(Continued)



**Table B.3** (Continued)

| <i>df</i> for the Denominator | Type I Error Rate | <i>df</i> for the Numerator |      |      |      |      |      |
|-------------------------------|-------------------|-----------------------------|------|------|------|------|------|
|                               |                   | 1                           | 2    | 3    | 4    | 5    | 6    |
| 11                            | .01               | 9.65                        | 7.21 | 6.22 | 5.67 | 5.32 | 5.07 |
|                               | .05               | 4.85                        | 3.98 | 3.59 | 3.36 | 3.20 | 3.10 |
|                               | .10               | 3.23                        | 2.86 | 2.66 | 2.54 | 2.45 | 2.39 |
| 12                            | .01               | 9.33                        | 6.93 | 5.95 | 5.41 | 5.07 | 4.82 |
|                               | .05               | 4.75                        | 3.89 | 3.49 | 3.26 | 3.11 | 3.00 |
|                               | .10               | 3.18                        | 2.81 | 2.61 | 2.48 | 2.40 | 2.33 |
| 13                            | .01               | 9.07                        | 6.70 | 5.74 | 5.21 | 4.86 | 4.62 |
|                               | .05               | 4.67                        | 3.81 | 3.41 | 3.18 | 3.03 | 2.92 |
|                               | .10               | 3.14                        | 2.76 | 2.56 | 2.43 | 2.35 | 2.28 |
| 14                            | .01               | 8.86                        | 6.52 | 5.56 | 5.04 | 4.70 | 4.46 |
|                               | .05               | 4.60                        | 3.74 | 3.34 | 3.11 | 2.96 | 2.85 |
|                               | .10               | 3.10                        | 2.73 | 2.52 | 2.40 | 2.31 | 2.24 |
| 15                            | .01               | 8.68                        | 6.36 | 5.42 | 4.89 | 4.56 | 4.32 |
|                               | .05               | 4.54                        | 3.68 | 3.29 | 3.06 | 2.90 | 2.79 |
|                               | .10               | 3.07                        | 2.70 | 2.49 | 2.36 | 2.27 | 2.21 |
| 16                            | .01               | 8.53                        | 6.23 | 5.29 | 4.77 | 4.44 | 4.20 |
|                               | .05               | 4.49                        | 3.63 | 3.24 | 3.01 | 2.85 | 2.74 |
|                               | .10               | 3.05                        | 2.67 | 2.46 | 2.33 | 2.24 | 2.18 |
| 17                            | .01               | 8.40                        | 6.11 | 5.19 | 4.67 | 4.34 | 4.10 |
|                               | .05               | 4.45                        | 3.59 | 3.20 | 2.97 | 2.81 | 2.70 |
|                               | .10               | 3.03                        | 2.65 | 2.44 | 2.31 | 2.22 | 2.15 |
| 18                            | .01               | 8.29                        | 6.01 | 5.09 | 4.58 | 4.25 | 4.02 |
|                               | .05               | 4.41                        | 3.56 | 3.16 | 2.93 | 2.77 | 2.66 |
|                               | .10               | 3.01                        | 2.62 | 2.42 | 2.29 | 2.20 | 2.13 |
| 19                            | .01               | 8.19                        | 5.93 | 5.01 | 4.50 | 4.17 | 3.94 |
|                               | .05               | 4.38                        | 3.52 | 3.13 | 2.90 | 2.74 | 2.63 |
|                               | .10               | 2.99                        | 2.61 | 2.40 | 2.27 | 2.18 | 2.11 |
| 20                            | .01               | 8.10                        | 5.85 | 4.94 | 4.43 | 4.10 | 3.87 |
|                               | .05               | 4.35                        | 3.49 | 3.10 | 2.87 | 2.71 | 2.60 |
|                               | .10               | 2.98                        | 2.59 | 2.38 | 2.25 | 2.16 | 2.09 |

|                               |                   | <i>df</i> for the Numerator |      |      |      |      |      |
|-------------------------------|-------------------|-----------------------------|------|------|------|------|------|
| <i>df</i> for the Denominator | Type I Error Rate | 1                           | 2    | 3    | 4    | 5    | 6    |
| 21                            | .01               | 8.02                        | 5.78 | 4.88 | 4.37 | 4.04 | 3.81 |
|                               | .05               | 4.33                        | 3.47 | 3.07 | 2.84 | 2.69 | 2.57 |
|                               | .10               | 2.96                        | 2.58 | 2.37 | 2.23 | 2.14 | 2.08 |
| 22                            | .01               | 7.95                        | 5.72 | 4.82 | 4.31 | 3.99 | 3.76 |
|                               | .05               | 4.30                        | 3.44 | 3.05 | 2.82 | 2.66 | 2.55 |
|                               | .10               | 2.95                        | 2.56 | 2.35 | 2.22 | 2.13 | 2.06 |
| 23                            | .01               | 7.88                        | 5.66 | 4.77 | 4.26 | 3.94 | 3.71 |
|                               | .05               | 4.28                        | 3.42 | 3.03 | 2.80 | 2.64 | 2.53 |
|                               | .10               | 2.94                        | 2.55 | 2.34 | 2.21 | 2.12 | 2.05 |
| 24                            | .01               | 7.82                        | 5.61 | 4.72 | 4.22 | 3.90 | 3.67 |
|                               | .05               | 4.26                        | 3.40 | 3.01 | 2.78 | 2.62 | 2.51 |
|                               | .10               | 2.93                        | 2.54 | 2.33 | 2.20 | 2.10 | 2.04 |
| 25                            | .01               | 7.77                        | 5.57 | 4.68 | 4.18 | 3.86 | 3.63 |
|                               | .05               | 4.24                        | 3.39 | 2.99 | 2.76 | 2.60 | 2.49 |
|                               | .10               | 2.92                        | 2.53 | 2.32 | 2.19 | 2.09 | 2.03 |
| 26                            | .01               | 7.72                        | 5.53 | 4.64 | 4.14 | 3.82 | 3.59 |
|                               | .05               | 4.23                        | 3.37 | 2.98 | 2.74 | 2.59 | 2.48 |
|                               | .10               | 2.91                        | 2.52 | 2.31 | 2.18 | 2.08 | 2.01 |
| 27                            | .01               | 7.68                        | 5.49 | 4.60 | 4.11 | 3.79 | 3.56 |
|                               | .05               | 4.21                        | 3.36 | 2.96 | 2.73 | 2.57 | 2.46 |
|                               | .10               | 2.90                        | 2.51 | 2.30 | 2.17 | 2.07 | 2.01 |
| 28                            | .01               | 7.64                        | 5.45 | 4.57 | 4.08 | 3.75 | 3.53 |
|                               | .05               | 4.20                        | 3.34 | 2.95 | 2.72 | 2.56 | 2.45 |
|                               | .10               | 2.89                        | 2.50 | 2.29 | 2.16 | 2.07 | 2.00 |
| 29                            | .01               | 7.60                        | 5.42 | 4.54 | 4.05 | 3.73 | 3.50 |
|                               | .05               | 4.18                        | 3.33 | 2.94 | 2.70 | 2.55 | 2.43 |
|                               | .10               | 2.89                        | 2.50 | 2.28 | 2.15 | 2.06 | 1.99 |
| 30                            | .01               | 7.56                        | 5.39 | 4.51 | 4.02 | 3.70 | 3.47 |
|                               | .05               | 4.17                        | 3.32 | 2.92 | 2.69 | 2.53 | 2.42 |
|                               | .10               | 2.88                        | 2.49 | 2.28 | 2.14 | 2.05 | 1.98 |
| 35                            | .01               | 7.42                        | 5.27 | 4.40 | 3.91 | 3.59 | 3.37 |
|                               | .05               | 4.12                        | 3.27 | 2.88 | 2.64 | 2.49 | 2.37 |
|                               | .10               | 2.86                        | 2.46 | 2.25 | 2.14 | 2.02 | 1.95 |
| 40                            | .01               | 7.32                        | 5.18 | 4.31 | 3.91 | 3.51 | 3.29 |
|                               | .05               | 4.09                        | 3.23 | 2.84 | 2.64 | 2.45 | 2.34 |
|                               | .10               | 2.84                        | 2.44 | 2.23 | 2.11 | 2.00 | 1.93 |

(Continued)

**Table B.3** (Continued)

| <i>df</i> for the Denominator | Type I Error Rate | <i>df</i> for the Numerator |      |      |      |      |      |
|-------------------------------|-------------------|-----------------------------|------|------|------|------|------|
|                               |                   | 1                           | 2    | 3    | 4    | 5    | 6    |
| 45                            | .01               | 7.23                        | 5.11 | 4.25 | 3.83 | 3.46 | 3.23 |
|                               | .05               | 4.06                        | 3.21 | 2.81 | 2.61 | 2.42 | 2.31 |
|                               | .10               | 2.82                        | 2.43 | 2.21 | 2.09 | 1.98 | 1.91 |
| 50                            | .01               | 7.17                        | 5.06 | 4.20 | 3.77 | 3.41 | 3.19 |
|                               | .05               | 4.04                        | 3.18 | 2.79 | 2.58 | 2.40 | 2.29 |
|                               | .10               | 2.81                        | 2.41 | 2.20 | 2.08 | 1.97 | 1.90 |
| 55                            | .01               | 7.12                        | 5.01 | 4.16 | 3.72 | 3.37 | 3.15 |
|                               | .05               | 4.02                        | 3.17 | 2.77 | 2.56 | 2.38 | 2.27 |
|                               | .10               | 2.80                        | 2.40 | 2.19 | 2.06 | 1.96 | 1.89 |
| 60                            | .01               | 7.08                        | 4.98 | 4.13 | 3.68 | 3.34 | 3.12 |
|                               | .05               | 4.00                        | 3.15 | 2.76 | 2.54 | 2.37 | 2.26 |
|                               | .10               | 2.79                        | 2.39 | 2.18 | 2.05 | 1.95 | 1.88 |
| 65                            | .01               | 7.04                        | 4.95 | 4.10 | 3.65 | 3.31 | 3.09 |
|                               | .05               | 3.99                        | 3.14 | 2.75 | 2.53 | 2.36 | 2.24 |
|                               | .10               | 2.79                        | 2.39 | 2.17 | 2.04 | 1.94 | 1.87 |
| 70                            | .01               | 7.01                        | 4.92 | 4.08 | 3.62 | 3.29 | 3.07 |
|                               | .05               | 3.98                        | 3.13 | 2.74 | 2.51 | 2.35 | 2.23 |
|                               | .10               | 2.78                        | 2.38 | 2.16 | 2.03 | 1.93 | 1.86 |
| 75                            | .01               | 6.99                        | 4.90 | 4.06 | 3.60 | 3.27 | 3.05 |
|                               | .05               | 3.97                        | 3.12 | 2.73 | 2.50 | 2.34 | 2.22 |
|                               | .10               | 2.77                        | 2.38 | 2.16 | 2.03 | 1.93 | 1.86 |
| 80                            | .01               | 3.96                        | 4.88 | 4.04 | 3.56 | 3.26 | 3.04 |
|                               | .05               | 6.96                        | 3.11 | 2.72 | 2.49 | 2.33 | 2.22 |
|                               | .10               | 2.77                        | 2.37 | 2.15 | 2.02 | 1.92 | 1.85 |
| 85                            | .01               | 6.94                        | 4.86 | 4.02 | 3.55 | 3.24 | 3.02 |
|                               | .05               | 3.95                        | 3.10 | 2.71 | 2.48 | 2.32 | 2.21 |
|                               | .10               | 2.77                        | 2.37 | 2.15 | 2.01 | 1.92 | 1.85 |
| 90                            | .01               | 6.93                        | 4.85 | 4.02 | 3.54 | 3.23 | 3.01 |
|                               | .05               | 3.95                        | 3.10 | 2.71 | 2.47 | 2.32 | 2.20 |
|                               | .10               | 2.76                        | 2.36 | 2.15 | 2.01 | 1.91 | 1.84 |
| 95                            | .01               | 6.91                        | 4.84 | 4.00 | 3.52 | 3.22 | 3.00 |
|                               | .05               | 3.94                        | 3.09 | 2.70 | 2.47 | 2.31 | 2.20 |
|                               | .10               | 2.76                        | 2.36 | 2.14 | 2.01 | 1.91 | 1.84 |
| 100                           | .01               | 6.90                        | 4.82 | 3.98 | 3.51 | 3.21 | 2.99 |
|                               | .05               | 3.94                        | 3.09 | 2.70 | 2.46 | 2.31 | 2.19 |
|                               | .10               | 2.76                        | 2.36 | 2.14 | 2.00 | 1.91 | 1.83 |
| Infinity                      | .01               | 6.64                        | 4.61 | 3.78 | 3.32 | 3.02 | 2.80 |
|                               | .05               | 3.84                        | 3.00 | 2.61 | 2.37 | 2.22 | 2.10 |
|                               | .10               | 2.71                        | 2.30 | 2.08 | 1.95 | 1.85 | 1.78 |

---

**TABLE B.4: VALUES OF THE CORRELATION COEFFICIENT NEEDED FOR REJECTION OF THE NULL HYPOTHESIS**

---

How to use this table:

1. Compute the value of the correlation coefficient.
2. Compare the value of the correlation coefficient with the critical value listed in this table.
3. If the obtained value is greater than the critical or tabled value, the null hypothesis (that the correlation coefficient is equal to 0) is not the most attractive explanation for any observed differences.
4. If the obtained value is less than the critical or tabled value, the null hypothesis is the most attractive explanation for any observed differences.

**Table B.4** Values of the Correlation Coefficient Needed for Rejection of the Null Hypothesis

| One-Tailed Test |       |       | Two-Tailed Test |       |       |
|-----------------|-------|-------|-----------------|-------|-------|
| <i>df</i>       | .05   | .01   | <i>df</i>       | .05   | .01   |
| 1               | .9877 | .9995 | 1               | .9969 | .9999 |
| 2               | .9000 | .9800 | 2               | .9500 | .9900 |
| 3               | .8054 | .9343 | 3               | .8783 | .9587 |
| 4               | .7293 | .8822 | 4               | .8114 | .9172 |
| 5               | .6694 | .832  | 5               | .7545 | .8745 |
| 6               | .6215 | .7887 | 6               | .7067 | .8343 |
| 7               | .5822 | .7498 | 7               | .6664 | .7977 |
| 8               | .5494 | .7155 | 8               | .6319 | .7646 |
| 9               | .5214 | .6851 | 9               | .6021 | .7348 |
| 10              | .4973 | .6581 | 10              | .5760 | .7079 |
| 11              | .4762 | .6339 | 11              | .5529 | .6835 |
| 12              | .4575 | .6120 | 12              | .5324 | .6614 |
| 13              | .4409 | .5923 | 13              | .5139 | .6411 |
| 14              | .4259 | .5742 | 14              | .4973 | .6226 |
| 15              | .412  | .5577 | 15              | .4821 | .6055 |
| 16              | .4000 | .5425 | 16              | .4683 | .5897 |
| 17              | .3887 | .5285 | 17              | .4555 | .5751 |
| 18              | .3783 | .5155 | 18              | .4438 | .5614 |
| 19              | .3687 | .5034 | 19              | .4329 | .5487 |
| 20              | .3598 | .4921 | 20              | .4227 | .5368 |
| 25              | .3233 | .4451 | 25              | .3809 | .4869 |
| 30              | .2960 | .4093 | 30              | .3494 | .4487 |
| 35              | .2746 | .3810 | 35              | .3246 | .4182 |
| 40              | .2573 | .3578 | 40              | .3044 | .3932 |
| 45              | .2428 | .3384 | 45              | .2875 | .3721 |
| 50              | .2306 | .3218 | 50              | .2732 | .3541 |
| 60              | .2108 | .2948 | 60              | .2500 | .3248 |
| 70              | .1954 | .2737 | 70              | .2319 | .3017 |
| 80              | .1829 | .2565 | 80              | .2172 | .2830 |
| 90              | .1726 | .2422 | 90              | .2050 | .2673 |
| 100             | .1638 | .2301 | 100             | .1946 | .2540 |

---

**TABLE B.5: CRITICAL VALUES FOR THE CHI-SQUARE TEST**

---

How to use this table:

1. Compute the  $\chi^2$  value.
2. Determine the number of degrees of freedom for the rows ( $R - 1$ ) and the number of degrees of freedom for the columns ( $C - 1$ ). If it's a one-dimension table, then you have only columns.
3. Locate the critical value by locating the degrees of freedom in the titled ( $df$ ) column, and under the appropriate column for level of significance, read across.
4. If the obtained value is greater than the critical or tabled value, the null hypothesis (that the frequencies are equal to one another) is not the most attractive explanation for any observed differences.
5. If the obtained value is less than the critical or tabled value, the null hypothesis is the most attractive explanation for any observed differences.

**Table B.5** Critical Values for the Chi-Square Test

| <i>df</i> | Level of Significance |            |            |
|-----------|-----------------------|------------|------------|
|           | <b>.10</b>            | <b>.05</b> | <b>.01</b> |
| 1         | 2.71                  | 3.84       | 6.64       |
| 2         | 4.00                  | 5.99       | 9.21       |
| 3         | 6.25                  | 7.82       | 11.34      |
| 4         | 7.78                  | 9.49       | 13.28      |
| 5         | 9.24                  | 11.07      | 15.09      |
| 6         | 10.64                 | 12.59      | 16.81      |
| 7         | 12.02                 | 14.07      | 18.48      |
| 8         | 13.36                 | 15.51      | 20.09      |
| 9         | 14.68                 | 16.92      | 21.67      |
| 10        | 16.99                 | 18.31      | 23.21      |
| 11        | 17.28                 | 19.68      | 24.72      |
| 12        | 18.65                 | 21.03      | 26.22      |
| 13        | 19.81                 | 22.36      | 27.69      |
| 14        | 21.06                 | 23.68      | 29.14      |
| 15        | 22.31                 | 25.00      | 30.58      |
| 16        | 23.54                 | 26.30      | 32.00      |
| 17        | 24.77                 | 27.60      | 33.41      |
| 18        | 25.99                 | 28.87      | 34.80      |
| 19        | 27.20                 | 30.14      | 36.19      |
| 20        | 28.41                 | 31.41      | 37.57      |
| 21        | 29.62                 | 32.67      | 38.93      |
| 22        | 30.81                 | 33.92      | 40.29      |
| 23        | 32.01                 | 35.17      | 41.64      |
| 24        | 33.20                 | 36.42      | 42.98      |
| 25        | 34.38                 | 37.65      | 44.81      |
| 26        | 35.56                 | 38.88      | 45.64      |
| 27        | 36.74                 | 40.11      | 46.96      |
| 28        | 37.92                 | 41.34      | 48.28      |
| 29        | 39.09                 | 42.56      | 49.59      |
| 30        | 40.26                 | 43.77      | 50.89      |

## Snapshots

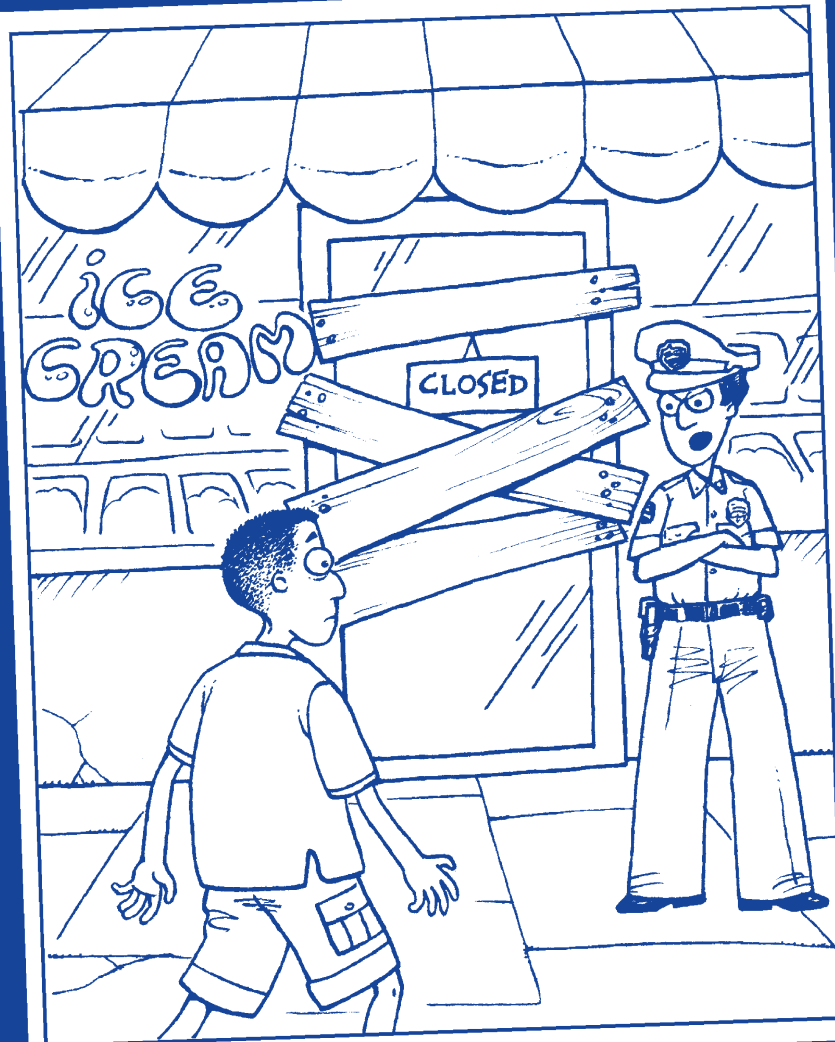

"Statistics show that crime rates rise with the sale of ice cream. Now do your part and move along..."
